# Supplementary material for: Combined Inhibition of STAT3 and DNA Repair in Palbociclib-Resistant ER-Positive Breast Cancer
Source: Oxford University Press journal article supplement (doi:10.1158/1078-0432.ccr-18-3274), 2019-03-13
Supplement: 210042_3_supp_5389176_pg2704.xlsx [file 210042_3_supp_5389176_pg2704.xlsx]

## Sheet: T47D Res CNV
chrom	chr_start	chr_stop	seg_mean	num_segments	num_markers	p_value	event_type	event_size	size_class	chrom_arm	arm_fraction	chrom_fraction
chr1	12851	23356818	0.533067	3	2637	1.15375e-09	amplification	23343968	focal	chr1p	0.1868	0.0937
chr1	23519497	26189175	0.405933	3	304	7.77623e-05	amplification	2669679	focal	chr1p	0.0214	0.0107
chr1	36039673	36040340	0.6205	1	4	3.49164e-10	amplification	668	focal	chr1p	0	0
chr1	47690942	47691459	0.5562	1	4	4.38337e-06	amplification	518	focal	chr1p	0	0
chr1	107599038	118657825	0.859645	11	1053	0.000133889	amplification	11058788	focal	chr1p	0.0885	0.0444
chr1	120168337	120935711	0.57855	2	88	6.80345e-06	amplification	767375	focal	chr1p	0.0061	0.0031
chr1	144615204	144621199	0.8652	1	5	4.82683e-10	amplification	5996	focal	chr1q	0	0
chr1	147955077	148025573	0.4861	1	19	1.09028e-10	amplification	70497	focal	chr1q	0.0006	0.0003
chr1	149261035	149725907	0.3663	1	31	1.9568e-34	amplification	464873	focal	chr1q	0.0037	0.0019
chr1	151810840	151811357	1.147	2	6	4.06564e-05	amplification	518	focal	chr1q	0	0
chr1	153043266	153043308	1.37	1	2	4.78423e-22	amplification	43	focal	chr1q	0	0
chr1	156646538	156646610	0.7017	1	3	2.02571e-29	amplification	73	focal	chr1q	0	0
chr1	166890161	166890198	1.146	1	2	3.86897e-38	amplification	38	focal	chr1q	0	0
chr1	200842517	200842561	0.94	1	2	1.70833e-29	amplification	45	focal	chr1q	0	0
chr1	248020224	248020996	0.552	1	3	2.12184e-43	amplification	773	focal	chr1q	0	0
chr10	88702754	88702792	1.8275	1	2	9.99512e-42	amplification	39	focal	chr10q	0	0
chr10	89577338	104686909	0.657275	4	1588	4.23302e-29	amplification	15109572	focal	chr10q	0.1585	0.1115
chr11	6591133	6703899	0.8137	1	22	2.91119e-63	amplification	112767	focal	chr11p	0.0021	0.0008
chr11	12030141	12030286	1.027	1	2	2.91004e-11	amplification	146	focal	chr11p	0	0
chr11	65306583	65306842	1.2085	1	2	6.92983e-17	amplification	260	focal	chr11q	0	0
chr11	82444229	82444373	1.655	1	2	1.24925e-20	amplification	145	focal	chr11q	0	0
chr12	15087589	15103263	1.1554	1	7	3.07819e-47	amplification	15675	focal	chr12p	0.0004	0.0001
chr12	107486390	108010728	0.3026	1	12	1.85803e-11	amplification	524339	focal	chr12q	0.0053	0.0039
chr14	59814096	60937969	1.1691	1	90	0	amplification	1123874	focal	chr14q	0.0125	0.0105
chr15	36691456	37390950	0.637	1	30	1.26903e-43	amplification	699495	focal	chr15q	0.0084	0.0068
chr15	49775214	57555091	1.52945	6	627	5.09177e-07	amplification	7779878	focal	chr15q	0.0931	0.0759
chr15	62456277	62456829	0.5442	1	4	1.57909e-05	amplification	553	focal	chr15q	0	0
chr15	65116171	65116362	1.645	1	3	1.00805e-36	amplification	192	focal	chr15q	0	0
chr15	65360247	65360280	1.3585	1	2	0.000299284	amplification	34	focal	chr15q	0	0
chr15	71507076	71507580	0.6709	1	4	6.93781e-25	amplification	505	focal	chr15q	0	0
chr15	83478737	83478978	0.527	1	3	4.42047e-10	amplification	242	focal	chr15q	0	0
chr16	2834443	2867056	0.8024	1	9	6.77576e-07	amplification	32614	focal	chr16p	0.0009	0.0004
chr17	56564782	57196375	0.3722	2	109	5.78223e-05	amplification	631594	focal	chr17q	0.011	0.0078
chr17	57915344	58078282	0.5297	1	41	6.88087e-13	amplification	162939	focal	chr17q	0.0028	0.002
chr17	58089999	58824291	0.5644	1	100	4.85818e-57	amplification	734293	focal	chr17q	0.0128	0.009
chr17	59445378	59984504	0.757433	3	61	5.47919e-09	amplification	539127	focal	chr17q	0.0094	0.0066
chr17	60215725	60215895	1.5216	1	7	9.96514e-72	amplification	171	focal	chr17q	0	0
chr17	79503887	79503961	1.448	1	2	6.82967e-19	amplification	75	focal	chr17q	0	0
chr18	12778	14888602	1.09837	3	898	2.0125e-17	amplification	14875825	large-scale	chr18p	0.8649	0.1905
chr18	18531173	28742346	0.70115	2	456	8.48004e-92	amplification	10211174	large-scale	chr18q	0.1677	0.1308
chr18	32335794	33767297	0.4162	1	103	2.14421e-67	amplification	1431504	focal	chr18q	0.0235	0.0183
chr18	43416918	43417645	0.9993	1	3	3.029e-12	amplification	728	focal	chr18q	0	0
chr19	110457	2217527	0.3744	1	502	1.19583e-12	amplification	2107071	focal	chr19p	0.0795	0.0356
chr19	2275791	31767315	0.886209	11	3596	2.221e-13	amplification	29491525	large-scale	chr19p	0.9141	0.4988
chr19	40723686	40724163	0.905	1	3	2.8897e-10	amplification	478	focal	chr19q	0	0
chr19	41018726	41018958	1.6205	1	2	1.36044e-20	amplification	233	focal	chr19q	0	0
chr19	49164713	49165378	1.482	1	5	3.46289e-52	amplification	666	focal	chr19q	0	0
chr19	51601692	51607699	1.079	1	4	3.73837e-21	amplification	6008	focal	chr19q	0.0002	0.0001
chr19	55944713	55944867	1.0813	1	3	9.99649e-06	amplification	155	focal	chr19q	0	0
chr19	56126305	56126517	0.847	1	3	1.78798e-09	amplification	213	focal	chr19q	0	0
chr2	41413	14139135	0.4697	1	535	3.29368e-106	amplification	14097723	focal	chr2p	0.1511	0.058
chr2	32602475	32706245	0.4882	1	33	8.63819e-12	amplification	103771	focal	chr2p	0.0011	0.0004
chr2	39222049	56104652	0.6488	7	865	0.000527223	amplification	16882604	focal	chr2p	0.1809	0.0694
chr2	58453670	62729484	0.3212	1	191	1.44129e-12	amplification	4275815	focal	chr2p	0.0458	0.0176
chr2	68609539	191109523	0.3014	2	6498	2.0791e-14	amplification	122499985	large-scale	chr2q	0.6525	0.5037
chr2	239072168	239072695	1.124	1	3	6.58919e-10	amplification	528	focal	chr2q	0	0
chr2	241564454	243060996	0.4458	1	299	0	amplification	1496543	focal	chr2q	0.01	0.0062
chr20	21376363	21377522	0.7022	1	4	6.79545e-19	amplification	1160	focal	chr20p	0	0
chr20	22563555	22563616	0.5227	1	3	1.15761e-05	amplification	62	focal	chr20p	0	0
chr20	39657480	40979148	0.46415	2	106	0.0354684	amplification	1321669	focal	chr20q	0.0372	0.021
chr20	42199095	47557559	0.533543	7	531	0.000212713	amplification	5358465	focal	chr20q	0.1508	0.085
chr20	47892087	48494328	0.364	1	36	2.09428e-19	amplification	602242	focal	chr20q	0.017	0.0096
chr20	49307292	49411448	0.6409	1	7	1.67689e-17	amplification	104157	focal	chr20q	0.0029	0.0017
chr20	50714736	50726827	0.6233	1	4	7.8509e-07	amplification	12092	focal	chr20q	0.0003	0.0002
chr20	52185322	57089833	0.5996	5	191	0.000557399	amplification	4904512	focal	chr20q	0.1381	0.0778
chr3	9957053	9957117	0.8427	1	3	6.80435e-22	amplification	65	focal	chr3p	0	0
chr3	48693592	48693702	0.9635	1	2	1.34256e-08	amplification	111	focal	chr3p	0	0
chr3	61644744	64671939	0.532	2	153	1.93948e-14	amplification	3027196	focal	chr3p	0.0333	0.0153
chr3	128720199	128721138	0.3949	1	7	1.99686e-09	amplification	940	focal	chr3q	0	0
chr3	174951567	175472874	0.5016	1	14	3.05117e-07	amplification	521308	focal	chr3q	0.0049	0.0026
chr3	176848954	197941972	0.772533	3	1469	0.0153079	amplification	21093019	focal	chr3q	0.1971	0.1065
chr4	5889948	5894522	0.5733	1	7	5.0836e-14	amplification	4575	focal	chr4p	0.0001	0
chr4	24801661	24801809	1.3355	1	2	2.69461e-17	amplification	149	focal	chr4p	0	0
chr4	48492021	48493271	0.8182	1	4	2.37309e-12	amplification	1251	focal	chr4p	0	0
chr5	90159455	90678512	0.3407	1	16	4.7287e-11	amplification	519058	focal	chr5q	0.0039	0.0029
chr5	112321338	112458221	0.3681	1	23	3.51091e-19	amplification	136884	focal	chr5q	0.001	0.0008
chr5	169015245	180710191	0.3163	1	947	0	amplification	11694947	focal	chr5q	0.0883	0.0646
chr6	1312688	1391131	1.0275	2	13	7.50311e-09	amplification	78444	focal	chr6p	0.0013	0.0005
chr6	31961888	31980600	0.5183	1	7	5.91192e-22	amplification	18713	focal	chr6p	0.0003	0.0001
chr6	32485356	32521055	0.6962	1	6	0.00109515	amplification	35700	focal	chr6p	0.0006	0.0002
chr6	62284064	153364878	0.735033	3	3937	2.00585e-21	amplification	91080815	large-scale	chr6q	0.8271	0.5323
chr7	1272840	1272896	1.7735	1	2	1.10852e-25	amplification	57	focal	chr7p	0	0
chr7	5427106	5428831	0.7919	1	6	5.2062e-14	amplification	1726	focal	chr7p	0	0
chr7	6590696	6590777	0.7553	1	3	8.32907e-07	amplification	82	focal	chr7p	0	0
chr7	6661985	6662006	1.4055	1	2	1.30833e-05	amplification	22	focal	chr7p	0	0
chr7	6693231	6694185	1.333	1	7	8.57861e-53	amplification	955	focal	chr7p	0	0
chr7	27285701	27285748	1.1655	1	2	1.83995e-11	amplification	48	focal	chr7p	0	0
chr7	32110514	32110750	1.0445	1	2	4.99076e-08	amplification	237	focal	chr7p	0	0
chr7	62701794	74554576	0.5137	4	626	1.5705e-05	amplification	11852783	focal	chr7q	0.1194	0.0745
chr7	74789711	82476323	0.984367	3	436	2.20894e-12	amplification	7686613	focal	chr7q	0.0775	0.0483
chr7	101891515	101892375	0.6708	1	5	1.17438e-13	amplification	861	focal	chr7q	0	0
chr7	101944268	101944368	1.196	1	3	5.40029e-21	amplification	101	focal	chr7q	0	0
chr7	150094707	150094782	0.757	1	3	1.00053e-12	amplification	76	focal	chr7q	0	0
chr7	150654988	150655224	1.127	1	2	5.93811e-28	amplification	237	focal	chr7q	0	0
chr7	151078683	151078721	1.3645	1	2	1.41664e-24	amplification	39	focal	chr7q	0	0
chr7	155595452	155596148	0.708	1	4	2.87284e-20	amplification	697	focal	chr7q	0	0
chr8	47490883	76459690	0.537075	4	1072	1.00697e-05	amplification	28968808	large-scale	chr8q	0.2875	0.1979
chr8	79073132	80524025	0.416	1	25	1.39879e-15	amplification	1450894	focal	chr8q	0.0144	0.0099
chr8	80525654	86253685	0.4035	1	166	2.39648e-174	amplification	5728032	focal	chr8q	0.0568	0.0391
chr8	110656999	119451884	0.514333	3	139	0.00163293	amplification	8794886	focal	chr8q	0.0873	0.0601
chr8	143545390	143545689	0.7063	1	3	3.83244e-08	amplification	300	focal	chr8q	0	0
chr8	144809937	144810050	1.016	1	2	8.06174e-09	amplification	114	focal	chr8q	0	0
chr8	145104107	145104261	1.8695	1	4	1.69789e-77	amplification	155	focal	chr8q	0	0
chr9	977324	977397	0.684	1	3	2.4467e-08	amplification	74	focal	chr9p	0	0
chr9	100616309	100616350	0.918	1	2	3.40443e-12	amplification	42	focal	chr9q	0	0
chr9	126135494	126135902	1.166	1	4	1.8804e-20	amplification	409	focal	chr9q	0	0
chrX	40794411	41074973	0.2643	1	31	2.63114e-14	amplification	280563	focal	chrXp	0.0046	0.0018
chrX	103495113	103495127	1.969	1	2	6.74926e-45	amplification	15	focal	chrXq	0	0
chr1	142803449	143230200	-0.4334	1	14	6.4161e-09	deletion	426752	focal	chr1q	0.0034	0.0017
chr1	157670008	166889697	-0.7323	1	693	3.97691e-40	deletion	9219690	focal	chr1q	0.0742	0.037
chr1	166890308	180601085	-0.591283	6	1053	0.0120552	deletion	13710778	focal	chr1q	0.1103	0.055
chr1	181620295	200842480	-0.5411	3	924	9.89749e-09	deletion	19222186	focal	chr1q	0.1547	0.0771
chr1	200842606	248005149	-0.660537	8	3450	3.69361e-07	deletion	47162544	large-scale	chr1q	0.3796	0.1892
chr1	248023688	248569104	-0.5321	1	28	4.06503e-12	deletion	545417	focal	chr1q	0.0044	0.0022
chr1	248605261	249230716	-0.5627	1	29	0	deletion	625456	focal	chr1q	0.005	0.0025
chr10	92913	47746845	-0.5447	3	2267	1.97946e-05	deletion	47653933	large-scale	chr10p	0.9977	0.3516
chr10	47928205	52569434	-0.80595	2	394	5.9599e-09	deletion	4641230	focal	chr10q	0.0487	0.0342
chr10	54173027	60588337	-0.4705	1	98	1.7763e-58	deletion	6415311	focal	chr10q	0.0673	0.0473
chr12	111296167	133810458	-0.2786	1	1966	0	deletion	22514292	large-scale	chr12q	0.2296	0.1682
chr13	19043184	60240518	-0.665643	7	2103	3.52241e-08	deletion	41197335	large-scale	chr13q	0.4235	0.3577
chr14	90418590	105995508	-0.5713	4	1351	9.0418e-06	deletion	15576919	large-scale	chr14q	0.1736	0.1451
chr15	70958865	71456478	-0.2678	1	50	2.80803e-23	deletion	497614	focal	chr15q	0.006	0.0049
chr15	71507616	83478237	-0.394	1	1155	7.31235e-14	deletion	11970622	focal	chr15q	0.1433	0.1168
chr15	83479036	102415951	-0.533967	3	1111	0.0032094	deletion	18936916	large-scale	chr15q	0.2267	0.1847
chr16	3029467	3115598	-0.2968	1	17	3.33873e-13	deletion	86132	focal	chr16p	0.0024	0.001
chr16	28074598	28592215	-0.2586	1	68	1.76947e-05	deletion	517618	focal	chr16p	0.0141	0.0057
chr16	46763338	70873809	-0.3111	2	1819	2.86221e-13	deletion	24110472	large-scale	chr16q	0.4485	0.2668
chr16	71209298	90161994	-0.2569	1	1365	0.066966	deletion	18952697	large-scale	chr16q	0.3526	0.2098
chr17	5788	7306194	-0.54135	2	1053	5.17709e-11	deletion	7300407	large-scale	chr17p	0.3042	0.0899
chr17	7311982	25418240	-0.57835	2	1575	1.76459e-40	deletion	18106259	large-scale	chr17p	0.6953	0.223
chr17	28175732	28935308	-0.4803	1	104	6.99284e-56	deletion	759577	focal	chr17q	0.0133	0.0094
chr17	81009364	81187577	-0.2844	1	7	0	deletion	178214	focal	chr17q	0.0031	0.0022
chr18	28898060	31802719	-0.3005	1	192	1.12179e-166	deletion	2904660	focal	chr18q	0.0477	0.0372
chr20	9624599	21369704	-0.26	1	509	1.39812e-18	deletion	11745106	large-scale	chr20p	0.4271	0.1864
chr21	9911786	14439029	-0.3345	1	47	4.17481e-10	deletion	4527244	focal	chr21p	0.2491	0.0941
chr21	32202084	48084017	-0.3384	3	1494	1.633e-08	deletion	15881934	large-scale	chr21q	0.4547	0.33
chr3	58303028	58318639	-1.179	1	2	7.56915e-06	deletion	15612	focal	chr3p	0.0002	0.0001
chr3	98376489	98600210	-0.4256	1	26	2.58285e-15	deletion	223722	focal	chr3q	0.0021	0.0011
chr3	158072444	161220620	-0.3357	1	170	7.16586e-98	deletion	3148177	focal	chr3q	0.0294	0.0159
chr4	120432020	178514564	-0.4428	3	1907	3.86322e-13	deletion	58082545	large-scale	chr4q	0.4127	0.3039
chr5	140219	50092655	-0.511433	3	1812	2.56846e-110	deletion	49952437	large-scale	chr5p	0.9971	0.2761
chr5	75888508	75989003	-0.4385	1	25	2.05301e-12	deletion	100496	focal	chr5q	0.0008	0.0006
chr5	128359147	128863343	-0.384	1	20	1.16048e-08	deletion	504197	focal	chr5q	0.0038	0.0028
chr5	130517774	132224643	-0.3168	1	206	2.66832e-17	deletion	1706870	focal	chr5q	0.0129	0.0094
chr5	132431623	168727278	-0.4793	3	2161	8.89779e-41	deletion	36295656	large-scale	chr5q	0.2739	0.2006
chr6	17783705	17950446	-0.3942	1	29	1.16839e-13	deletion	166742	focal	chr6p	0.0027	0.001
chr6	31994648	31996693	-1.4	1	2	1.34099e-16	deletion	2046	focal	chr6p	0	0
chr6	153603227	170948734	-0.5076	1	870	0	deletion	17345508	focal	chr6q	0.1575	0.1014
chr7	2671699	2739862	-0.2686	1	12	1.64247e-06	deletion	68164	focal	chr7p	0.0011	0.0004
chr7	12254271	12271273	-0.497	1	7	3.45517e-07	deletion	17003	focal	chr7p	0.0003	0.0001
chr7	98951405	98994173	-0.3079	1	14	1.83986e-11	deletion	42769	focal	chr7q	0.0004	0.0003
chr7	114174528	150094659	-0.2628	1	1976	1.095e-15	deletion	35920132	large-scale	chr7q	0.362	0.2257
chr7	150094815	150654218	-0.3134	1	40	1.83895e-18	deletion	559404	focal	chr7q	0.0056	0.0035
chr7	150655314	151078090	-0.3276	1	101	4.48141e-38	deletion	422777	focal	chr7q	0.0043	0.0027
chr7	151078830	155567079	-0.2699	1	194	1.69105e-16	deletion	4488250	focal	chr7q	0.0452	0.0282
chr7	155596223	159025667	-0.357033	3	192	2.92408e-05	deletion	3429445	focal	chr7q	0.0346	0.0216
chr8	41545565	41800547	-0.3962	1	33	0.000693605	deletion	254983	focal	chr8p	0.0056	0.0017
chr8	42623389	43094715	-0.4844	1	58	0.0119987	deletion	471327	focal	chr8p	0.0103	0.0032
chr8	80524109	80525486	-0.697	1	2	3.46025e-11	deletion	1378	focal	chr8q	0	0
chr8	121583191	124951156	-0.349	1	131	5.82379e-19	deletion	3367966	focal	chr8q	0.0334	0.023
chr8	128427827	134256394	-0.508	2	244	3.82602e-06	deletion	5828568	focal	chr8q	0.0578	0.0398
chr9	22008514	27358867	-0.2577	1	101	4.37217e-08	deletion	5350354	focal	chr9p	0.1092	0.0379
chr9	39795970	77761400	-0.550567	3	594	5.6166e-06	deletion	37965431	large-scale	chr9q	0.3119	0.2689
chr9	116222279	116967885	-0.3603	1	74	0.00702757	deletion	745607	focal	chr9q	0.0081	0.0053
chr9	119625637	123164864	-0.2616	1	29	4.64798e-09	deletion	3539228	focal	chr9q	0.0384	0.0251
chr9	129812152	133273727	-0.4558	3	639	6.25775e-06	deletion	3461576	focal	chr9q	0.0375	0.0245
chr9	134022691	135133631	-0.2562	1	117	3.6208e-12	deletion	1110941	focal	chr9q	0.012	0.0079
chrX	8433287	9621454	-0.4922	1	33	2.04739e-21	deletion	1188168	focal	chrXp	0.0196	0.0077
chrX	155251222	155254542	-0.3498	1	4	0	deletion	3321	focal	chrXq	0	0
chr1	52242363	85537453	-0.0685	1	1742	1.03796e-08	neutral	33295091	large-scale	chr1p	0.2664	0.1336
chr1	145138927	147931717	0.0176	1	282	1.37684e-19	neutral	2792791	focal	chr1q	0.0225	0.0112
chr1	151755146	151810157	0.1038	1	12	2.04249e-52	neutral	55012	focal	chr1q	0.0004	0.0002
chr1	151955426	152057247	-0.1863	1	11	0.000118788	neutral	101822	focal	chr1q	0.0008	0.0004
chr1	152483813	153042843	0.2217	1	30	1.06189e-14	neutral	559031	focal	chr1q	0.0045	0.0022
chr1	155708107	156646497	-0.1778	1	216	9.36096e-18	neutral	938391	focal	chr1q	0.0076	0.0038
chr1	157489334	157669262	-0.0744	1	34	5.03137e-82	neutral	179929	focal	chr1q	0.0014	0.0007
chr11	86799	180073	0.097	1	7	0.138801	neutral	93275	focal	chr11p	0.0017	0.0007
chr11	4496007	6586749	-0.0186	1	165	1.09488e-79	neutral	2090743	focal	chr11p	0.0389	0.0155
chr11	43922897	65178558	-0.0982	1	1871	0.00383983	neutral	21255662	large-scale	chr11p	0.1821	0.1574
chr11	117251200	120007785	0.1911	1	378	2.0435e-49	neutral	2756586	focal	chr11q	0.0339	0.0204
chr11	123065459	134257301	0.2111	1	662	0	neutral	11191843	focal	chr11q	0.1377	0.0829
chr12	7480733	9352819	-0.0411	1	275	2.60167e-07	neutral	1872087	focal	chr12p	0.0523	0.014
chr12	41900043	51064784	-0.1582	1	698	2.69481e-07	neutral	9164742	focal	chr12q	0.0935	0.0685
chr12	56862194	57132952	0.1009	1	60	1.19798e-10	neutral	270759	focal	chr12q	0.0028	0.002
chr12	61624815	66308615	-0.2218	1	276	4.30745e-35	neutral	4683801	focal	chr12q	0.0478	0.035
chr12	109863580	111290515	-0.0983	1	245	1.6686e-38	neutral	1426936	focal	chr12q	0.0146	0.0107
chr14	19114337	56116363	-0.0951	1	1898	1.75859e-10	neutral	37002027	large-scale	chr14q	0.4123	0.3447
chr14	58332281	59806596	-0.0951	1	114	8.71631e-285	neutral	1474316	focal	chr14q	0.0164	0.0137
chr15	20092834	35838571	0.074	1	1048	3.15194e-40	neutral	15745738	large-scale	chr15q	0.1885	0.1536
chr15	63028869	63891229	0.1939	1	88	9.16537e-37	neutral	862361	focal	chr15q	0.0103	0.0084
chr15	65394671	70956775	-0.1231	1	492	2.82297e-05	neutral	5562105	focal	chr15q	0.0666	0.0542
chr16	64130	2826778	0.09	1	654	9.37928e-20	neutral	2762649	focal	chr16p	0.0755	0.0306
chr16	8948883	16409888	0.2015	1	611	0.00131812	neutral	7461006	focal	chr16p	0.2039	0.0826
chr16	17564087	22390924	-0.0739	1	603	1.82974e-37	neutral	4826838	focal	chr16p	0.1319	0.0534
chr16	24761837	28074348	-0.0591	1	192	2.2266e-08	neutral	3312512	focal	chr16p	0.0905	0.0367
chr16	29339766	34338389	0.1549	1	595	2.90402e-34	neutral	4998624	focal	chr16p	0.1366	0.0553
chr17	44952222	56557035	0.0379	1	915	2.43303e-10	neutral	11604814	large-scale	chr17q	0.2029	0.1429
chr17	60741673	65734853	-0.0073	1	510	7.05738e-12	neutral	4993181	focal	chr17q	0.0873	0.0615
chr19	57909486	59097426	0.0269	1	196	0	neutral	1187941	focal	chr19q	0.0364	0.0201
chr2	214228673	220499779	0.121	1	601	6.13515e-07	neutral	6271107	focal	chr2q	0.0418	0.0258
chr2	223494709	239071230	0.2092	1	1089	2.05452e-08	neutral	15576522	focal	chr2q	0.1039	0.064
chr20	29872736	37619935	0.0949	1	1074	0.0390812	neutral	7747200	focal	chr20q	0.2181	0.1229
chr20	58546790	62958526	-0.0108	1	466	0	neutral	4411737	focal	chr20q	0.1242	0.07
chr22	16364745	34986006	0.2034	1	1927	0	neutral	18621262	large-scale	chr22q	0.5087	0.363
chr3	361282	4023531	-0.1754	1	96	1.35183e-09	neutral	3662250	focal	chr3p	0.0402	0.0185
chr3	4776872	7732736	-0.1028	1	54	0.0157406	neutral	2955865	focal	chr3p	0.0325	0.0149
chr3	27161081	41288229	-0.245	1	852	4.0896e-68	neutral	14127149	focal	chr3p	0.1552	0.0713
chr3	129350737	150419721	0.1568	1	1270	2.1446e-34	neutral	21068985	focal	chr3q	0.1969	0.1064
chr6	1612298	17780807	-0.1191	1	677	3.9791e-08	neutral	16168510	large-scale	chr6p	0.2651	0.0945
chr6	32712754	37059068	-0.1448	1	586	7.22209e-28	neutral	4346315	focal	chr6p	0.0713	0.0254
chr6	37787675	58776222	-0.1213	1	1509	0	neutral	20988548	large-scale	chr6p	0.3441	0.1227
chr7	31734912	32109649	0.1628	1	22	1.10813e-10	neutral	374738	focal	chr7p	0.0063	0.0024
chr7	36926998	43622672	0.2397	1	224	1.21961e-06	neutral	6695675	focal	chr7p	0.1118	0.0421
chr8	91803940	101964951	0.014	1	588	6.18395e-14	neutral	10161012	focal	chr8q	0.1008	0.0694
chr8	103855604	104453484	0.0084	1	42	0.000155845	neutral	597881	focal	chr8q	0.0059	0.0041
chr8	105600848	110656591	-0.0274	1	186	2.73888e-34	neutral	5055744	focal	chr8q	0.0502	0.0345
chr8	142146392	143435779	-0.0059	1	79	1.07723e-11	neutral	1289388	focal	chr8q	0.0128	0.0088
chr9	13058	976933	-0.0468	1	89	7.07107e-09	neutral	963876	focal	chr9p	0.0197	0.0068
chr9	114206516	116190991	-0.0601	1	215	2.80652e-25	neutral	1984476	focal	chr9q	0.0215	0.0141
chr9	117054178	119582695	-0.0937	1	145	7.31987e-05	neutral	2528518	focal	chr9q	0.0274	0.0179
chr9	124062280	126135232	-0.1286	1	195	2.75521e-38	neutral	2072953	focal	chr9q	0.0225	0.0147
chr9	137591605	140449451	-0.2381	1	551	0.00123674	neutral	2857847	focal	chr9q	0.031	0.0202
chrX	200696	8137945	-0.091	1	220	2.31909e-17	neutral	7937250	focal	chrXp	0.131	0.0511
chrX	74288670	75396592	0.1702	1	43	6.43341e-13	neutral	1107923	focal	chrXq	0.0117	0.0071
chrX	149282547	155239317	0.162	1	553	0.000652879	neutral	5956771	focal	chrXq	0.0629	0.0384

## Sheet: MCF7 Res CNV
chrom	chr_start	chr_stop	seg_mean	num_segments	num_markers	p_value	event_type	event_size	size_class	chrom_arm	arm_fraction	chrom_fraction
chr1	12826	17086544	0.67155	2	2222	8.71496e-18	amplification	17073719	focal	chr1p	0.1366	0.0685
chr1	17090733	26189201	0.7438	1	1261	0	amplification	9098469	focal	chr1p	0.0728	0.0365
chr1	107599053	108144870	0.5642	1	18	1.53163e-06	amplification	545818	focal	chr1p	0.0044	0.0022
chr1	108679060	114681961	0.68586	5	770	0.000298167	amplification	6002902	focal	chr1p	0.048	0.0241
chr1	114784833	116269363	0.4374	1	146	7.94084e-17	amplification	1484531	focal	chr1p	0.0119	0.006
chr1	116605158	119157356	0.876825	4	226	7.82539e-05	amplification	2552199	focal	chr1p	0.0204	0.0102
chr1	120301543	121309784	0.47675	2	100	0.26703	amplification	1008242	focal	chr1p	0.0081	0.004
chr1	143361890	146519585	0.6577	1	398	1.03031e-13	amplification	3157696	focal	chr1q	0.0254	0.0127
chr1	146522205	152185302	0.99186	5	697	4.86361e-07	amplification	5663098	focal	chr1q	0.0456	0.0227
chr1	152190486	157667942	0.621467	3	1049	4.74863e-19	amplification	5477457	focal	chr1q	0.0441	0.022
chr1	161642972	161643158	1.929	1	3	1.18997e-28	amplification	187	focal	chr1q	0	0
chr1	166244719	167088274	0.455	1	50	6.2895e-07	amplification	843556	focal	chr1q	0.0068	0.0034
chr1	168510589	171939141	0.523	1	326	1.35644e-12	amplification	3428553	focal	chr1q	0.0276	0.0138
chr1	171956230	178063471	0.5015	1	400	5.3684e-19	amplification	6107242	focal	chr1q	0.0492	0.0245
chr1	178875789	181480292	0.56395	2	251	0.00116221	amplification	2604504	focal	chr1q	0.021	0.0104
chr1	214813061	219384658	0.422	1	167	3.42751e-182	amplification	4571598	focal	chr1q	0.0368	0.0183
chr10	51873696	51890499	0.5732	1	13	1.00884e-09	amplification	16804	focal	chr10q	0.0002	0.0001
chr11	11941589	35684401	0.5966	1	1473	0	amplification	23742813	large-scale	chr11p	0.4421	0.1759
chr11	117117329	119290985	0.6428	1	414	2.78533e-158	amplification	2173657	focal	chr11q	0.0267	0.0161
chr12	92436	17553284	0.6743	1	1915	0	amplification	17460849	large-scale	chr12p	0.4877	0.1304
chr12	56865065	57132964	0.5557	1	65	1.84778e-28	amplification	267900	focal	chr12q	0.0027	0.002
chr12	78225043	100550729	0.5547	1	1038	4.92913e-14	amplification	22325687	large-scale	chr12q	0.2277	0.1668
chr12	100551181	109047915	0.538	1	850	2.16251e-45	amplification	8496735	focal	chr12q	0.0867	0.0635
chr12	109052305	110449652	0.5461	1	277	1.13773e-42	amplification	1397348	focal	chr12q	0.0143	0.0104
chr13	60348175	64313365	0.8319	1	63	4.9119e-13	amplification	3965191	focal	chr13q	0.0408	0.0344
chr13	64313536	115089134	0.7485	1	1703	0	amplification	50775599	large-scale	chr13q	0.522	0.4409
chr14	35280025	37716899	0.4604	1	185	3.71985e-36	amplification	2436875	focal	chr14q	0.0272	0.0227
chr14	62162290	62545914	0.52	1	34	7.25151e-12	amplification	383625	focal	chr14q	0.0043	0.0036
chr14	96904008	96968737	0.4831	1	16	5.11278e-37	amplification	64730	focal	chr14q	0.0007	0.0006
chr15	20087465	22646600	0.57995	2	173	0.0014272	amplification	2559136	focal	chr15q	0.0306	0.025
chr15	22763519	28801400	0.9594	5	424	0.00653562	amplification	6037882	focal	chr15q	0.0723	0.0589
chr15	28805480	30877930	0.7223	1	206	2.39843e-28	amplification	2072451	focal	chr15q	0.0248	0.0202
chr15	30895612	31745331	0.7303	1	128	1.40338e-20	amplification	849720	focal	chr15q	0.0102	0.0083
chr15	31776238	34387925	0.7556	1	254	2.57062e-243	amplification	2611688	focal	chr15q	0.0313	0.0255
chr15	49775168	57555107	0.9281	4	693	0.00317183	amplification	7779940	focal	chr15q	0.0931	0.0759
chr15	58247257	70388265	0.638733	3	1271	0.000116346	amplification	12141009	focal	chr15q	0.1453	0.1184
chr15	75406868	85808112	0.8461	2	1119	4.71751e-18	amplification	10401245	focal	chr15q	0.1245	0.1014
chr15	85813197	102516337	0.2646	1	950	0	amplification	16703141	large-scale	chr15q	0.2	0.1629
chr16	85394	3361565	0.79878	5	815	0.00265422	amplification	3276172	focal	chr16p	0.0895	0.0363
chr16	4406984	4827648	0.5166	1	115	2.35361e-21	amplification	420665	focal	chr16p	0.0115	0.0047
chr16	5081578	5147098	0.5485	1	31	4.44375e-07	amplification	65521	focal	chr16p	0.0018	0.0007
chr16	5517084	10551087	0.5222	1	142	5.15702e-50	amplification	5034004	focal	chr16p	0.1375	0.0557
chr16	15596004	16442521	0.6114	1	192	6.58023e-52	amplification	846518	focal	chr16p	0.0231	0.0094
chr16	16449954	17564066	0.5418	1	33	3.73544e-09	amplification	1114113	focal	chr16p	0.0304	0.0123
chr16	22443917	24769453	0.5998	1	215	1.00669e-72	amplification	2325537	focal	chr16p	0.0635	0.0257
chr16	29394743	29394902	2.358	1	4	2.17287e-35	amplification	160	focal	chr16p	0	0
chr16	31191314	33817730	1.12642	5	308	0.00192796	amplification	2626417	focal	chr16p	0.0718	0.0291
chr16	34320244	35037166	0.6905	1	27	3.51769e-17	amplification	716923	focal	chr16p	0.0196	0.0079
chr17	25418272	25747760	0.2573	1	19	4.8414e-21	amplification	329489	focal	chr17q	0.0058	0.0041
chr17	56636592	57208444	0.6848	1	83	1.51117e-34	amplification	571853	focal	chr17q	0.01	0.007
chr17	57915427	58928891	0.674	1	161	5.55144e-31	amplification	1013465	focal	chr17q	0.0177	0.0125
chr17	59205291	60741660	0.48635	4	212	0.00298742	amplification	1536370	focal	chr17q	0.0269	0.0189
chr17	62746478	81187621	0.5393	4	2257	1.71111e-11	amplification	18441144	large-scale	chr17q	0.3224	0.2271
chr18	12758	88298	0.9291	1	11	1.08628e-09	amplification	75541	focal	chr18p	0.0044	0.001
chr18	116696	14851363	1.1104	1	1031	2.20961e-49	amplification	14734668	large-scale	chr18p	0.8567	0.1887
chr18	14855851	15325608	0.903	1	20	9.13837e-24	amplification	469758	focal	chr18p	0.0273	0.006
chr18	71740519	76886126	0.4933	2	170	2.82604e-10	amplification	5145608	focal	chr18q	0.0845	0.0659
chr19	3969533	4367203	0.5211	1	125	1.37278e-31	amplification	397671	focal	chr19p	0.015	0.0067
chr19	10046809	17212282	0.671167	3	1489	1.67971e-12	amplification	7165474	large-scale	chr19p	0.2704	0.1212
chr19	17881009	29282716	0.5399	1	851	3.52109e-241	amplification	11401708	large-scale	chr19p	0.3252	0.1928
chr2	41444	10205864	0.68355	2	414	0.00129809	amplification	10164421	focal	chr2p	0.1089	0.0418
chr2	10262572	37410388	0.519575	4	1906	9.59711e-14	amplification	27147817	large-scale	chr2p	0.291	0.1116
chr2	37414320	58273460	0.58254	5	1099	0.000953105	amplification	20859141	focal	chr2p	0.2236	0.0858
chr2	58905230	62787964	0.526	1	215	2.95672e-72	amplification	3882735	focal	chr2p	0.0416	0.016
chr2	68544138	110518195	0.5107	1	2899	1.18174e-34	amplification	41974058	large-scale	chr2p	0.2653	0.1726
chr2	110671746	128183466	0.4995	1	873	6.7075e-17	amplification	17511721	focal	chr2q	0.1168	0.072
chr2	128184525	130986869	0.5235	1	253	6.6219e-07	amplification	2802345	focal	chr2q	0.0187	0.0115
chr2	131027209	132860966	0.8739	2	189	4.27974e-08	amplification	1833758	focal	chr2q	0.0122	0.0075
chr2	133066622	202265558	0.775625	4	4002	7.70704e-09	amplification	69198937	large-scale	chr2q	0.4616	0.2845
chr2	223386296	243064326	0.8949	5	1809	6.18625e-07	amplification	19678031	focal	chr2q	0.1313	0.0809
chr20	470266	488959	0.8917	1	9	2.81038e-10	amplification	18694	focal	chr20p	0.0007	0.0003
chr20	7866045	21376350	0.5811	1	723	1.14309e-15	amplification	13510306	large-scale	chr20p	0.4913	0.2144
chr20	21469020	26173800	0.5203	1	227	3.54335e-15	amplification	4704781	focal	chr20p	0.1711	0.0746
chr20	26210982	29632439	0.2829	1	15	0.0144486	amplification	3421458	focal	chr20q	0.06	0.0543
chr20	29845299	30865516	0.6201	1	182	1.00196e-96	amplification	1020218	focal	chr20q	0.0287	0.0162
chr20	42195559	44869418	0.3863	1	397	4.70645e-21	amplification	2673860	focal	chr20q	0.0753	0.0424
chr20	45279736	45618465	0.505	1	10	0.000198817	amplification	338730	focal	chr20q	0.0095	0.0054
chr20	45797487	47538178	0.789	1	111	7.0133e-148	amplification	1740692	focal	chr20q	0.049	0.0276
chr20	49299088	49411943	0.8219	1	10	6.16501e-14	amplification	112856	focal	chr20q	0.0032	0.0018
chr20	52185362	55840408	0.6512	2	121	1.97039e-20	amplification	3655047	focal	chr20q	0.1029	0.058
chr20	57282452	58587951	0.683333	3	124	9.67864e-05	amplification	1305500	focal	chr20q	0.0367	0.0207
chr21	14751770	14759874	0.3385	1	6	6.23132e-08	amplification	8105	focal	chr21q	0.0002	0.0002
chr22	16084078	20670910	0.4319	1	681	6.84565e-10	amplification	4586833	focal	chr22q	0.1253	0.0894
chr22	20671295	34987118	0.6174	2	1831	2.02578e-131	amplification	14315824	large-scale	chr22q	0.3911	0.279
chr3	8794440	9860119	0.2629	1	140	7.9957e-18	amplification	1065680	focal	chr3p	0.0117	0.0054
chr3	25502487	30045166	0.3662	1	202	9.23771e-61	amplification	4542680	focal	chr3p	0.0499	0.0229
chr3	61644735	64671935	0.756733	3	152	0.0109101	amplification	3027201	focal	chr3p	0.0333	0.0153
chr3	71833992	72136382	1.047	1	3	4.16757e-06	amplification	302391	focal	chr3p	0.0033	0.0015
chr3	129350693	158015664	0.3467	1	1761	3.06007e-109	amplification	28664972	large-scale	chr3q	0.2678	0.1448
chr3	161077308	197941922	0.6536	2	2156	0	amplification	36864615	large-scale	chr3q	0.3445	0.1862
chr4	22694491	39449790	0.69145	2	488	4.82305e-13	amplification	16755300	large-scale	chr4p	0.3324	0.0877
chr4	190905327	190905862	0.9708	1	6	2.54586e-10	amplification	536	focal	chr4q	0	0
chr5	49440777	49904204	0.3336	1	11	0.00129465	amplification	463428	focal	chr5q	0.0035	0.0026
chr5	132334116	132426720	0.6507	1	18	1.66209e-13	amplification	92605	focal	chr5q	0.0007	0.0005
chr5	169081253	171433298	0.5846	3	186	1.6987e-09	amplification	2352046	focal	chr5q	0.0177	0.013
chr5	171681446	177771698	0.4565	1	535	4.2058e-17	amplification	6090253	focal	chr5q	0.046	0.0337
chr5	177987471	180751390	0.4171	1	368	0	amplification	2763920	focal	chr5q	0.0209	0.0153
chr6	31961871	31981442	1.05765	2	25	0.000170517	amplification	19572	focal	chr6p	0.0003	0.0001
chr6	32485321	32497870	1.1673	1	6	3.4588e-25	amplification	12550	focal	chr6p	0.0002	0.0001
chr6	32521036	32522315	1.01	1	4	2.51736e-05	amplification	1280	focal	chr6p	0	0
chr6	32608886	32634163	0.7161	1	10	5.21179e-22	amplification	25278	focal	chr6p	0.0004	0.0001
chr6	57372079	57842367	0.4098	1	16	6.42226e-06	amplification	470289	focal	chr6p	0.0077	0.0027
chr6	62284054	132101854	0.3933	1	3118	2.21546e-14	amplification	69817801	large-scale	chr6q	0.634	0.408
chr6	132129218	153364903	0.4207	1	1318	1.59243e-277	amplification	21235686	focal	chr6q	0.1928	0.1241
chr8	48033685	64122032	0.593167	3	683	0.000109937	amplification	16088348	focal	chr8q	0.1597	0.1099
chr8	65517095	86249085	0.867167	6	827	9.8881e-06	amplification	20731991	large-scale	chr8q	0.2057	0.1416
chr8	113236814	121560817	0.4704	2	348	5.2073e-17	amplification	8324004	focal	chr8q	0.0826	0.0569
chr8	130772609	130774722	0.3905	1	4	0.00606395	amplification	2114	focal	chr8q	0	0
chr8	141935579	143603103	0.32	1	111	1.41425e-19	amplification	1667525	focal	chr8q	0.0165	0.0114
chr9	71736394	71760458	0.934	1	2	2.26244e-10	amplification	24065	focal	chr9q	0.0003	0.0002
chr9	109484589	113547660	0.856767	3	293	4.91518e-07	amplification	4063072	focal	chr9q	0.0441	0.0288
chr9	134657854	134738272	0.2572	1	4	7.32677e-05	amplification	80419	focal	chr9q	0.0009	0.0006
chrX	200694	37400897	0.3326	1	1629	2.61101e-14	amplification	37200204	large-scale	chrXp	0.6139	0.2396
chrX	37401199	41202837	0.4924	3	235	0.0241572	amplification	3801639	focal	chrXp	0.0627	0.0245
chrX	95939827	128782410	0.513	1	1532	1.56291e-17	amplification	32842584	large-scale	chrXq	0.3469	0.2115
chrX	128788397	149105477	0.5463	1	804	4.03735e-124	amplification	20317081	large-scale	chrXq	0.2146	0.1308
chr1	17088213	17088225	-1.0745	1	2	2.89661e-20	deletion	13	focal	chr1p	0	0
chr1	32134075	32134096	-2.3495	1	2	3.40082e-34	deletion	22	focal	chr1p	0	0
chr1	114767799	114767946	-0.7114	1	5	2.41137e-39	deletion	148	focal	chr1p	0	0
chr1	142799549	142841022	-0.4479	1	16	5.90514e-05	deletion	41474	focal	chr1q	0.0003	0.0002
chr1	143278754	143280445	-1.8447	1	4	7.4222e-49	deletion	1692	focal	chr1q	0	0
chr1	146522163	146522177	-1.2295	1	2	2.65408e-14	deletion	15	focal	chr1q	0	0
chr1	171955559	171955624	-0.7125	1	2	1.2193e-11	deletion	66	focal	chr1q	0	0
chr1	183080020	183080046	-1.886	1	2	2.76144e-41	deletion	27	focal	chr1q	0	0
chr1	201749351	201984087	-0.5888	2	65	9.39775e-23	deletion	234737	focal	chr1q	0.0019	0.0009
chr1	207925330	214810980	-0.8506	1	445	0	deletion	6885651	focal	chr1q	0.0554	0.0276
chr1	246887583	249230732	-0.5635	1	198	0	deletion	2343150	focal	chr1q	0.0189	0.0094
chr10	11560353	38894405	-0.3957	1	1684	1.24742e-31	deletion	27334053	large-scale	chr10p	0.68	0.2017
chr10	46584233	46584333	-2.2685	1	2	1.09012e-12	deletion	101	focal	chr10q	0	0
chr10	47928463	48001886	-0.8488	1	12	3.92637e-15	deletion	73424	focal	chr10q	0.0008	0.0005
chr10	49224799	49327730	-1.54033	3	18	2.43434e-11	deletion	102932	focal	chr10q	0.0011	0.0008
chr10	79713462	79713503	-1.4915	1	2	8.75838e-14	deletion	42	focal	chr10q	0	0
chr10	101599998	101600199	-1.397	1	9	5.37747e-52	deletion	202	focal	chr10q	0	0
chr11	303952	303994	-1.4967	1	3	6.20382e-17	deletion	43	focal	chr11p	0	0
chr11	69588524	69588543	-2.326	1	2	3.55523e-26	deletion	20	focal	chr11q	0	0
chr12	30879220	30879233	-2.2045	1	2	1.58657e-30	deletion	14	focal	chr12p	0	0
chr12	52696601	52696838	-0.9552	1	4	1.1748e-14	deletion	238	focal	chr12q	0	0
chr12	100550902	100550948	-0.995	1	2	1.16478e-17	deletion	47	focal	chr12q	0	0
chr12	109048339	109051449	-1.2643	1	4	1.97242e-44	deletion	3111	focal	chr12q	0	0
chr13	19410878	19410924	-1.8875	1	2	9.57015e-13	deletion	47	focal	chr13q	0	0
chr13	21141696	50935459	-0.8611	6	1991	0.166667	deletion	29793764	large-scale	chr13q	0.3063	0.2587
chr13	64313402	64313435	-0.859	1	2	1.93177e-13	deletion	34	focal	chr13q	0	0
chr14	31050119	31416127	-0.2647	1	64	7.82945e-06	deletion	366009	focal	chr14q	0.0041	0.0034
chr14	68119944	68119972	-1.697	1	3	3.08871e-31	deletion	29	focal	chr14q	0	0
chr14	90203461	96889908	-0.393	1	717	3.33614e-34	deletion	6686448	focal	chr14q	0.0745	0.0623
chr14	96986211	107281402	-0.4132	1	795	0	deletion	10295192	focal	chr14q	0.1147	0.0959
chr15	28801640	28803709	-0.4787	1	3	1.21582e-09	deletion	2070	focal	chr15q	0	0
chr15	30888861	30888968	-1.0445	1	4	7.66681e-27	deletion	108	focal	chr15q	0	0
chr15	31775634	31775658	-1.098	1	3	6.17156e-18	deletion	25	focal	chr15q	0	0
chr15	85812413	85812722	-2.4737	1	4	1.49117e-107	deletion	310	focal	chr15q	0	0
chr16	5416116	5416130	-2	1	2	9.96125e-37	deletion	15	focal	chr16p	0	0
chr16	16445526	16445586	-1.8487	1	3	8.10354e-38	deletion	61	focal	chr16p	0	0
chr16	33957934	33963963	-1.2481	1	10	0.00538456	deletion	6030	focal	chr16p	0.0002	0.0001
chr17	5827	9729185	-0.3974	1	1643	1.81389e-49	deletion	9723359	large-scale	chr17p	0.4051	0.1198
chr17	17754002	17884525	-1.0966	2	26	3.65002e-13	deletion	130524	focal	chr17p	0.0054	0.0016
chr17	18304533	18457193	-1.3761	4	52	0.0111091	deletion	152661	focal	chr17p	0.0064	0.0019
chr17	25748376	25748597	-1.8723	1	3	1.89133e-28	deletion	222	focal	chr17q	0	0
chr17	39723772	39723793	-2.196	1	2	8.57949e-31	deletion	22	focal	chr17q	0	0
chr17	46767853	46767894	-1.326	1	3	2.82518e-15	deletion	42	focal	chr17q	0	0
chr18	107858	116682	-0.4177	1	7	1.09159e-53	deletion	8825	focal	chr18p	0.0005	0.0001
chr18	14855633	14855644	-1.662	1	2	6.67707e-14	deletion	12	focal	chr18p	0	0
chr18	76903722	78005006	-0.86	1	97	0	deletion	1101285	focal	chr18q	0.0181	0.0141
chr19	2073197	2116014	-0.4846	1	19	1.29948e-10	deletion	42818	focal	chr19p	0.0016	0.0007
chr19	2219910	2275517	-0.4957	1	23	1.49788e-25	deletion	55608	focal	chr19p	0.0021	0.0009
chr2	10219995	10220225	-0.6783	1	3	2.64232e-10	deletion	231	focal	chr2p	0	0
chr2	37410815	37410838	-1.512	1	2	4.3579e-17	deletion	24	focal	chr2p	0	0
chr2	110552153	110552452	-1.6497	1	3	1.64544e-36	deletion	300	focal	chr2q	0	0
chr2	128183962	128183994	-1.287	1	2	6.25316e-26	deletion	33	focal	chr2q	0	0
chr2	130989414	131025749	-0.2623	1	3	4.25269e-12	deletion	36336	focal	chr2q	0.0002	0.0001
chr2	133012719	133015150	-1.1088	1	4	2.5591e-05	deletion	2432	focal	chr2q	0	0
chr2	202627994	202628106	-1.2713	1	3	1.58266e-19	deletion	113	focal	chr2q	0	0
chr20	21377455	21378325	-0.7575	1	4	1.43181e-14	deletion	871	focal	chr20p	0	0
chr20	26189010	26190437	-0.512	1	6	3.4157e-08	deletion	1428	focal	chr20p	0.0001	0
chr21	14765888	39213146	-0.3345	1	1137	5.59924e-46	deletion	24447259	large-scale	chr21q	0.6999	0.5079
chr22	20671128	20671247	-0.7558	1	4	7.96276e-10	deletion	120	focal	chr22q	0	0
chr3	9860865	9860902	-0.7613	1	3	1.39708e-15	deletion	38	focal	chr3p	0	0
chr3	35759016	35759043	-1.991	1	2	1.60191e-24	deletion	28	focal	chr3p	0	0
chr3	113459775	113459824	-1.5955	1	2	4.7819e-16	deletion	50	focal	chr3q	0	0
chr4	53063	6826028	-0.4174	1	879	8.00487e-257	deletion	6772966	focal	chr4p	0.1344	0.0354
chr4	120459970	179208134	-0.57964	5	2220	1.32463e-12	deletion	58748165	large-scale	chr4q	0.4174	0.3073
chr5	58488	45695584	-0.82756	5	2078	0.0138729	deletion	45637097	large-scale	chr5p	0.9429	0.2523
chr5	49928786	50056045	-0.2522	1	8	0.00948915	deletion	127260	focal	chr5q	0.001	0.0007
chr5	157174488	157174556	-1.3443	1	4	3.74816e-20	deletion	69	focal	chr5q	0	0
chr5	177945653	177945833	-0.5019	1	7	4.9781e-16	deletion	181	focal	chr5q	0	0
chr6	31994635	31996929	-5.2467	1	6	3.86137e-91	deletion	2295	focal	chr6p	0	0
chr6	32520714	32520830	-3.3945	1	4	1.92785e-14	deletion	117	focal	chr6p	0	0
chr6	35086775	35086787	-1.6845	1	2	1.4893e-17	deletion	13	focal	chr6p	0	0
chr6	35620804	35620870	-1.3602	1	4	4.06675e-19	deletion	67	focal	chr6p	0	0
chr6	44151887	44151916	-2.699	1	2	5.03038e-27	deletion	30	focal	chr6p	0	0
chr6	132128999	132129109	-1.216	1	2	7.13766e-16	deletion	111	focal	chr6q	0	0
chr6	153603256	158322763	-0.384	1	170	5.42065e-10	deletion	4719508	focal	chr6q	0.0429	0.0276
chr6	169066882	170256794	-0.3847	2	81	0.000618182	deletion	1189913	focal	chr6q	0.0108	0.007
chr7	1996993	1997008	-2.3755	1	2	2.77969e-32	deletion	16	focal	chr7p	0	0
chr7	6831570	6831720	-1.4713	1	3	1.13964e-26	deletion	151	focal	chr7p	0	0
chr7	11582929	11582943	-1.5295	1	2	5.29325e-15	deletion	15	focal	chr7p	0	0
chr7	38696125	38696157	-1.3967	1	3	2.02473e-15	deletion	33	focal	chr7p	0	0
chr7	62956291	63017011	-0.5971	1	15	4.6277e-18	deletion	60721	focal	chr7q	0.0006	0.0004
chr7	130040269	130040860	-1.0004	1	5	4.40478e-18	deletion	592	focal	chr7q	0	0
chr7	137708996	137709029	-1.976	1	2	2.8746e-17	deletion	34	focal	chr7q	0	0
chr7	138126797	138175909	-0.8585	1	6	8.4415e-20	deletion	49113	focal	chr7q	0.0005	0.0003
chr8	22140334	22140346	-2.4185	1	2	5.17518e-30	deletion	13	focal	chr8p	0	0
chr8	33353221	33353260	-2.0495	1	2	4.85746e-13	deletion	40	focal	chr8p	0	0
chr8	41364479	41369068	-1.365	1	3	2.3722e-12	deletion	4590	focal	chr8p	0.0001	0
chr8	42215018	42215034	-1.459	1	2	1.79964e-07	deletion	17	focal	chr8p	0	0
chr8	86249405	91658046	-0.4539	1	211	2.22332e-127	deletion	5408642	focal	chr8q	0.0537	0.037
chr8	101612376	110986020	-0.2504	1	461	5e-299	deletion	9373645	focal	chr8q	0.093	0.064
chr8	121583213	130764609	-0.7802	3	300	0.00397053	deletion	9181397	focal	chr8q	0.0911	0.0627
chr8	143603711	143603746	-1.5375	1	2	5.03681e-15	deletion	36	focal	chr8q	0	0
chr9	67329311	67791229	-0.5206	1	8	8.48208e-05	deletion	461919	focal	chr9q	0.005	0.0033
chr9	69410033	69635406	-1.1434	2	24	0.000538471	deletion	225374	focal	chr9q	0.0024	0.0016
chr9	88989982	90940322	-0.2504	1	76	3.60657e-20	deletion	1950341	focal	chr9q	0.0212	0.0138
chr9	114325079	116971750	-0.2778	1	312	1.98643e-46	deletion	2646672	focal	chr9q	0.0287	0.0187
chr9	117853502	124061306	-0.2811	1	260	5.14301e-56	deletion	6207805	focal	chr9q	0.0673	0.044
chr9	127905162	128419753	-0.2593	1	61	4.99482e-12	deletion	514592	focal	chr9q	0.0056	0.0036
chr9	129455189	131394153	-0.2793	1	420	1.13646e-09	deletion	1938965	focal	chr9q	0.021	0.0137
chr9	131549396	133248204	-0.2505	1	235	9.14581e-25	deletion	1698809	focal	chr9q	0.0184	0.012
chr9	133488141	134615009	-0.2946	1	219	0.00174919	deletion	1126869	focal	chr9q	0.0122	0.008
chrX	37401136	37401170	-1.538	1	2	2.36427e-15	deletion	35	focal	chrXp	0	0
chrX	48305346	48305374	-1.7555	1	2	1.6873e-19	deletion	29	focal	chrXp	0	0
chrX	53619163	53619192	-1.8915	1	2	1.81067e-16	deletion	30	focal	chrXp	0	0
chrX	128782951	128782964	-1.365	1	2	1.681e-17	deletion	14	focal	chrXq	0	0
chr1	181679916	182368645	-0.1455	1	47	6.51356e-14	neutral	688730	focal	chr1q	0.0055	0.0028
chr10	52573442	54170849	0.1599	1	45	3.52045e-12	neutral	1597408	focal	chr10q	0.0168	0.0118
chr10	60588351	79685782	0.1724	1	1388	7.84017e-16	neutral	19097432	large-scale	chr10q	0.2003	0.1409
chr11	86795	303771	0.1685	1	57	1.29607e-17	neutral	216977	focal	chr11p	0.004	0.0016
chr12	73570	92422	-0.1701	1	8	1.46131e-12	neutral	18853	focal	chr12p	0.0005	0.0001
chr12	62147233	65462297	-0.1167	1	273	9.01877e-44	neutral	3315065	focal	chr12q	0.0338	0.0248
chr12	111279492	133811238	-0.1986	1	2245	0	neutral	22531747	large-scale	chr12q	0.2298	0.1683
chr14	19411492	30396307	0.1747	1	827	2.19194e-30	neutral	10984816	focal	chr14q	0.1224	0.1023
chr16	19451175	19619350	-0.1431	1	50	2.0165e-12	neutral	168176	focal	chr16p	0.0046	0.0019
chr16	28074159	28549948	-0.222	1	73	2.33113e-10	neutral	475790	focal	chr16p	0.013	0.0053
chr17	47677499	49297456	-0.1377	1	304	2.78149e-47	neutral	1619958	focal	chr17q	0.0283	0.02
chr21	9437266	14751663	-0.1204	1	96	0.0210995	neutral	5314398	large-scale	chr21p	0.2851	0.1104
chr21	44273463	48084032	-0.2108	1	650	0	neutral	3810570	focal	chr21q	0.1091	0.0792
chr3	361285	3221056	0.0259	1	99	1.59289e-07	neutral	2859772	focal	chr3p	0.0314	0.0144
chr3	7187966	8787027	-0.0993	1	46	4.70123e-23	neutral	1599062	focal	chr3p	0.0176	0.0081
chr3	41277641	61644708	0.2171	1	2397	2.23365e-07	neutral	20367068	focal	chr3p	0.2238	0.1029
chr3	75405650	113442033	0.0185	1	1309	2.45712e-14	neutral	38036384	large-scale	chr3q	0.2097	0.1921
chr5	136833867	157170606	-0.0222	1	1794	5.56129e-19	neutral	20336740	focal	chr5q	0.1535	0.1124
chr7	19635	1978434	0.2015	1	189	2.56967e-38	neutral	1958800	focal	chr7p	0.0327	0.0123
chr7	97363961	106820169	0.0762	1	1303	2.97073e-35	neutral	9456209	focal	chr7q	0.0953	0.0594
chr7	107872575	130039742	0.0964	1	1013	3.0337e-17	neutral	22167168	large-scale	chr7q	0.2234	0.1393
chr7	139826292	159026057	0.1827	1	1311	0	neutral	19199766	focal	chr7q	0.1935	0.1206
chr9	13043	1051341	0.0604	1	107	1.97139e-19	neutral	1038299	focal	chr9p	0.0212	0.0074
chr9	14845748	67328238	0.1921	1	1577	2.07894e-14	neutral	52482491	large-scale	chr9p	0.697	0.3717
chr9	78789695	88967418	0.0872	1	527	6.91667e-27	neutral	10177724	focal	chr9q	0.1104	0.0721
chr9	98279253	100087086	-0.2453	1	155	9.88967e-44	neutral	1807834	focal	chr9q	0.0196	0.0128
chr9	135133633	135564066	0.1907	1	78	5.2196e-17	neutral	430434	focal	chr9q	0.0047	0.003
chr9	136249550	136857087	0.1577	1	159	3.71596e-28	neutral	607538	focal	chr9q	0.0066	0.0043
chr9	138340285	139438271	0.151	1	257	6.58833e-11	neutral	1097987	focal	chr9q	0.0119	0.0078
chr9	139863662	140202335	0.1089	1	120	2.10668e-14	neutral	338674	focal	chr9q	0.0037	0.0024
chrY	9967877	59024218	-0.213	1	54	0	neutral	49056342	large-scale	chrYq	0.9925	0.8262

## Sheet: Intersection
chrom	chr_start	chr_stop	event_type	GOI
chr1	12851	23356818	amplification	MTOR
chr1	23519497	26189175	amplification
chr1	107599038	119157356	amplification
chr1	120168337	121309784	amplification
chr1	143361890	146519585	amplification
chr1	146522205	148025573	amplification
chr1	149261035	149725907	amplification
chr1	151810840	152185302	amplification
chr1	152190486	156043308	amplification	IL6R
chr1	156646538	157667942	amplification
chr1	166890161	171939141	amplification
chr12	100551181	109047915	amplification
chr15	49775168	57555107	amplification
chr15	58247257	62456829	amplification
chr15	65116171	65116362	amplification
chr15	65360247	70388265	amplification
chr15	75406868	85808112	amplification
chr17	56564782	57208444	amplification
chr17	57915344	58078282	amplification
chr17	58089999	58928891	amplification
chr17	59205291	59984504	amplification
chr17	60215725	60741660	amplification
chr18	12778	14888602	amplification
chr2	41413	14139135	amplification	GREB1
chr2	14602475	37410388	amplification
chr2	37414320	58273460	amplification
chr2	58453670	62729484	amplification
chr2	68609539	191109523	amplification
chr2	223386296	239072695	amplification
chr2	241564454	243060996	amplification
chr20	21469020	26173800	amplification
chr20	42199095	47557559	amplification
chr20	49299088	49411943	amplification
chr20	52185322	57089833	amplification
chr3	61644735	64671939	amplification
chr3	161077308	175472874	amplification
chr3	176848954	197941972	amplification
chr5	169015245	180751390	amplification	PIC3CA
chr6	31961871	31981442	amplification
chr6	32485321	32521055	amplification
chr6	62284054	153364903	amplification	ESR1
chr8	47490883	76459690	amplification
chr8	77073132	80524025	amplification
chr8	80525654	86253685	amplification
chr8	110656999	119451884	amplification
chr8	141935579	143603103	amplification
chr1	166890308	180601085	deletion
chr1	181620295	200842480	deletion
chr1	200842606	248005149	deletion	EXO1, SPRTN
chr1	248023688	248569104	deletion
chr1	248605261	249230716	deletion
chr10	92913	47746845	deletion	GATA3
chr10	47928205	52569434	deletion
chr13	19043184	60240518	deletion	RB1
chr14	90203461	107281402	deletion
chr17	5788	9729185	deletion
chr4	120432020	179208134	deletion
chr5	58488	45695584	deletion
chr5	49928786	50092655	deletion
chr5	132431623	168727278	deletion
chr6	31994635	31996929	deletion
chr6	153603256	158322763	deletion
chr6	159066882	170956794	deletion
chr8	121583213	134256394	deletion
chr9	114325079	116971750	deletion
chr9	117853502	124061306	deletion
chr9	129455189	131394153	deletion
chr9	131549396	133248204	deletion
chr9	133488141	134615009	deletion
