# Supplementary material for: Combined Inhibition of STAT3 and DNA Repair in Palbociclib-Resistant ER-Positive Breast Cancer
Source: Oxford University Press journal article supplement (doi:10.1158/1078-0432.ccr-18-3274), 2019-03-13
Supplement: 210042_3_supp_5389201_pp27kp.docx [file 210042_3_supp_5389201_pp27kp.docx]

**SUPPLEMENTAL FIGURES AND TABLES:**

**Supplemental Figure 1 (Related to Fig. 1):** Doubling time and cell cycle distribution are unaltered in resistant cells upon treatment with CDK4/6 inhibitors; resistant cells are not dependent on FOXA1 for hormone receptor signaling.

**Supplemental Figure 2 (Related to Fig. 2):** Palbociclib-resistant cells display varying responses to pan-CDK inhibitors and are less sensitive to everolimus due to loss of RB.

**Supplemental Figure 3 (Related to Fig. 3):** Induction of EMT, cell migration, CD44high; CD24low and ALDH and loss of apico-basal polarity in the palbociclib-resistant cells.

**Supplemental Figure 4 (related to figure 4):** Recombinant IL-6 treatment in parental cells promotes EMT, B-CSC-L, FOXA1, and pSTAT5.

**Supplemental Figure 5 (related to Figure 5):** Downregulation of pSTAT3 by pharmacological agents or shRNA (but not siRNA knockdown of FOXA1) affects B-CSC-L population.

**Supplemental Figure 6 (related to Figure 6):** Downregulation of DNA repair and double strand break repair in palbociclib resistant cells sensitizes cells to PARP and Wee1 inhibition.

**Supplemental Figure 7 (related to Figure 7):** PR and ER expression are correlated in post-treatment from patients who progressed on palbociclib.

**Table S1**. WES CNV analysis

**Table S2**. WES somatic mutations

**Table S3**. RNA-seq log2 fold change analysis

**Table S4**. GSEA analysis

**Table S5**. RPPA analysis

**Table S6.** Clinical, pathologic, and treatment characteristics of progressive and non-progressive patient cohorts.

**Table S7**. Clinical, pathologic, and treatment characteristics of patients who progressed (intrinsic or acquired) on first line (+ letrozole) or second line (+ fulvestrant) accrued for this study.

**Table S8**. Immunohistochemistry scoring of ER, PR, Cyclin E, γH2AX, pY-STAT3 and BRCA mutational status in patients who progressed on palbociclib.

**Supplemental Figure 1 (Related to Fig. 1): Doubling time and cell cycle distribution are unaltered in resistant cells upon treatment with CDK4/6 inhibitors; resistant cells are not dependent on FOXA1 for hormone receptor signaling. (A)** Cell counting and doubling time (DT) every 3 days showing effect of 1μM & 5μM palbociclib (Palbo) treatment for 6 days and recovery for 3 days on the proliferation of MCF-7 and T47D parental (Par) and resistant (Res) cell lines. **(B)** Cell counting and DT every 3 days showing effect of 1μM & 5μM ribociclib (Ribo) treatment for 6 days and recovery for 3 days of MCF-7 and T47D Par and Res cell lines. **(C)** Cell counting and DT every 3 days showing effect of 1μM & 5μM abemaciclib (Abema) treatment for 6 days and recovery for 3 days of MCF-7 and T47D Par and Res cell lines. **(D)** Cell cycle analysis by flow cytometry to examine the effect of Ribo treatment (1 & 5μM) on MCF-7 and T47D Par and Res cell lines. **(E)** Cell cycle analysis by flow cytometry to examine the effect of Abema treatment (1 & 5μM) on MCF-7 and T47D Par and Res cell lines. (**F**) Western blot confirming downregulation of AR and PR in T47D Res cells. (**G**) FOXA1 protein levels in T47D Par and Res cells. (**H**) Immunoblot confirming knockdown of FOXA1 protein after RNA interference (siRNA) for FOXA1 in resistant cells after 48 or 72 hours as compared to a non-targeting (NT) control siRNA. (**I**) siFOXA1 reduced mRNA levels of FOXA1 and ERα in the resistant cells 48h or 72h post-transfection. (**J**) qPCR analysis shows mRNA levels of estrogen responsive genes: pS2, progesterone receptor (PgR), and GREB1, transcription modulators of estrogen receptor: GATA3 & NRIP1**,** and androgen receptor (AR) in siFOXA1 resistant cells. (**K**) Unchanged mRNA levels of glucocorticoid receptor (GR) and aryl hydrocarbon receptor (AhR) in parental and resistant cells.(**L**) Dose response curve in MCF-7 Par and Res cell lines after treatment with mifepristone (RU486) for 3 days and recovery for 9 days. Dashed line depicts IC50 values. For all graphs, error bars describe SD, and Student t test determined p-values: *p<0.05, **p<0.01, ***p<0.001.

**Supplemental Figure 2 (Related to Fig. 2): Palbociclib-resistant cells display varying responses to pan-CDK inhibitors and are less sensitive to everolimus due to loss of RB.** Quantitation (top) and GST-Rb Kinase assay (bottom) of two independent *in vitro* kinase activity assay results (experiment #1: unhatched bars; experiment #2: hatched bars) in cell lysates from parental (Par) and resistant (Res) cells immunoprecipitated with either CDK2 (**A)** or cyclin E (**B)** antibody and subjected to the kinase assay using GST-Rb peptide as a substrate. A negative control of cell lysates immunoprecipitated with IgG and incubated with GST-Rb was used to normalize results. Dose response curves with pan CDK inhibitors roscovitine (**C, top panel)**, dinaciclib(**C, bottom panel)**, and SNS-032(**D)** in Par and Res cells after treatment for 3 days and recovery for 9 days. **(E)** Dose response curves in MCF-7 and T47D Par and Res cell lines after treatment with BKM120 for 3 days and recovery for 9 days. **(F)** Dose response curves in MCF-7 and T47D Par and Res cell lines after treatment with everolimus for 3 days and recovery for 9 days. (**G**) Clonogenic assay showing the effect of 1μM, 5μM and 10μM everolimus treatment for 3 days and 9 days recovery. (**H**) Western blot showing the effects of 1μM, 5μM and 10μM everolimus treatment for 3 days on protein levels of mTOR and S6 (targets of everolimus) in parental and resistant cells. (**I**) Confirmation by immunoblot of knockdown of RB by shRNA in MCF-7 parental cells compared to scramble (SCR). (**J**) Dose response curve in RB knockdown cells treated with everolimus for 3 days and recovery for 9 days. Dashed line depicts IC50 values.

**Supplemental Figure 3 (Related to Fig. 3): Induction of EMT, cell migration, CD44high; CD24low and ALDH and loss of apico-basal polarity in the palbociclib-resistant cells. (A)** Western blots show increased protein expression of EMT markers (N-cadherin & Vimentin) and decreased expression of E-cadherin in T47D Res cell lines. **(B)** GSEA enrichment plot of cell migration. **(C)** Scratch wound healing assay displays increased cell migration after 24 and 48 hours in MCF-7 and T47D Par and Res cells. **(D)** GSEA enrichment plot of apical surface markers.  **(E)** Acini formation in T47D Par and Res cells after 15 days in 3D culture as shown by bright-field and fluorescent immunostained with E-cadherin (green) and nuclei were counterstained with DAPI (blue). **(F)** Flow cytometry analysis with CD24 (y-axis: PE) and CD44 (x: axis: FL6 INT) to determine breast cancer stem cell-like population (B-CSC-L=lower right quadrant) in MCF-7 and T47D Par and Res cells. **(G)** Flow cytometry analysis with ALDH (green indicates ALDH positive cells) in MCF-7 and T47D Par and Res cells.

**Supplemental Figure 4 (related to figure 4): Recombinant IL-6 treatment in parental cells promotes EMT, B-CSC-L, FOXA1, and pSTAT5. (A)** Varying concentrations of exogenous IL-6 and IL-6Rα in MCF-7 parental to determine the concentration that best mimics the phenotype of the resistant cells. **(B)** Increased mRNA expression of EMT markers and transcription factors related to de-differentiation in the parental cells treated with 0.5ng/mL IL-6 and 0.125ng/mL IL-6Rα for 6 days (IL-6/IL-6Rα) compared to parental (Par) in T47D cell lines. **(C)** Breast cancer stem cell-like analysis on IL-6/IL-6Rα treated parental cellswith CD44 and CD24 surface markers. **(D)** Scratch wound healing assay displays increased cell migration after 12, 24 and 48 hours in IL-6/IL-6Rα treated MCF-7 and T47D Par cells. **(E)** Cell counting and doubling time every 3 days showing effect of IL-6/IL-6Rα treatment for 6 days and recovery for 3 days on the proliferation of MCF-7 Par cell lines. **(F)** Increased mRNA expression of FOXA1 in parental cells treated with IL-6/IL-6Rα for 6 days. **(G)** Immunoblot displaying increased levels of pSTAT5 in parental cells treated with IL-6/IL-6Rα for 6 days.

**Supplemental Figure 5 (related to Figure 5): Downregulation of pSTAT3 by pharmacological agents or shRNA (but not siRNA knockdown of FOXA1) affects B-CSC-L population. (A)** Ratio of relative protein levels of pY-STAT3 to STAT3 analyzed via image J depicting the increase in pY-STAT3 in MCF-7 Res cells compared to Par. **(B)** Western blot of total STAT5 and pY-STAT5 in parental and resistant cells. **(C)** Induction ofmRNA levels of STAT5a and STAT5b in the resistant cells compared to parental. **(D)** Dose response curve depicting the effect of treatment with varying concentrations (0-12μM) of Tofacitinib, a JAK inhibitor, for 3 days and recovery for 9 days. **(E)** Dose response curve depicting the effect of treatment with varying concentrations (0-12μM) of Stattic, a small-molecule inhibitor of STAT3 activation and dimerization, for 3 days and recovery for 9 days. **(F)** Western blot of cell lysates from resistant cells after treatment with IC50 of TTI-101 for 3 days showing the downregulation of pY-STAT3/STAT3 and pY-STAT5/STAT5 **(G)** mRNA levels of STAT5 after treatment with IC50 of TTI-101 for 3 days in the resistant cells **(H)** No change observed in mRNA expression of EMT markers and breast cancer stem cell-like (B-CSC-L) factors in the resistant cells treated with knockdown of FOXA1 **(I)** No change in B-CSC-L population in resistant cells with knockdown of FOXA1 as identified by CD44+/CD24- **(J)** mRNA levels of STAT3 and IL-6 after shRNA knockdown of STAT3 in the MCF-7 Res cells. **(K)** Western blot of total STAT3 and pY-STAT3 after shRNA knockdown of STAT3 **(L)** Decreased breast cancer stem cell-like population observed in the resistant cells as identified by CD44+/CD24- after shRNA knockdown of STAT3.

**Supplemental Figure 6 (related to Figure 6): Downregulation of DNA repair and double strand break repair in palbociclib resistant cells sensitizes cells to PARP and Wee1 inhibition. (A)** GSEA enrichment plot of DNA repair (top panel) and double strand break repair (bottom panel). (**B)** mRNA of DNA repair genes (BRCA1/2 and RAD51) have downregulated expression in the palbociclib-resistant cells. **(C)** Dose response curves show that resistant cells are sensitive to treatment with niraparib (PARP inhibitor). **(D)** Treatment with olaparib, niraparib, or AZD1775 for 3 days leaves the breast cancer stem cell-like (CD44+/CD24-) population unaltered in the Res cells. **(E)** Apoptosis analysis by flow cytometry using Annexin V shows increased apoptosis in the T47D resistant and parental cells treated with the combination of olaparib (Ola) and napabucasin (Napa) or Ola and TTI-101 after 3 days of treatment and after 3 days recovery (3+3). **(F)** Flow cytometry analysis using Annexin V, CD44, and CD24 markers identifying the viable (blue) or apoptotic (red) B-CSC-L (CD44+/CD24-) population of after 3 days of treatment with Ola, Napa, TTI-101 in MCF-7 resistant cells. **(G)** Apoptosis analysis by flow cytometry using Annexin V shows increased apoptosis in the T47D resistant and parental cells treated with the combination of Wee1 kinase inhibitor (AZD1775) and Napa or AZD1775 and TTI-101 after 3 days of treatment and after 3 days recovery (3+3). **(H)** Combination of Napa and AZD1775 or TTI-101 and AZD1775 are synergistic in the resistant cell lines as shown by the plotted combination index **(I)** Clonogenic assay showing the combination effect of 0.5μM Napa and 0.5μM AZD1775. **(J)** Clonogenic assay showing the combination effect of 0.3μM TTI-101 and 0.5μM AZD1775. **(K)** Apoptosis analysis by flow cytometry using Annexin V shows increased apoptosis in the resistant cells treated with the combination of Napa and AZD1775 or TTI-101 and AZD1775 after 3 days of treatment and after 3 days recovery (3+3).

**Supplemental Figure 7 (related to Figure 7): PR and ER expression are correlated in post-treatment from patients who progressed on palbociclib. (A)** Representative immunohistochemical (IHC) staining for PR levels pre- and post-palbociclib treatment. **(B)** Quantification of the 25 matched pre/post samples show a reduction in PR levels (red line) and no change or an increase in PR (grey dashed line) post-treatment. **(C)** Correlation coefficient for ERand PR pre- (no correlation r=0.06) and post-treatment (moderate correlation, r=0.47, p=0.03) **(D)** Quantification of the 25 matched pre/post samples showing either a reduction in RB levels (red line) and no change or an increase in RB (grey dashed line) post-treatment. **(E)** Age at start of treatment and progression-free survival of the 25 progressive matched pre/post samples used for IHC analysis compared to all palbociclib progressors at MDACC (whole cohort, n=359). **(F)** Age at start of treatment and time of therapy of the 29 non-progressive patient cohorts used for analysis compared to the whole cohort of patients receiving palbociclib with no progression (n=224).

**Table S1**. WES CNV analysis

*(external excel sheet)*

**Table S2**. WES somatic mutations

*(external excel sheet)*

**Table S3**. RNA-seq log2 fold change analysis

*(external excel sheet)*

**Table S4**. GSEA analysis

*(external excel sheet)*

**Table S5**. RPPA analysis

*(external excel sheet)*

**Table S6**. Clinical, pathologic, and treatment characteristics of progressive and non-progressive patient cohorts.

|  | **Progressors**  **N=25** | **Non-progressors**  **N=29** | **P value*** |
| --- | --- | --- | --- |
| **Age at start of palbo** |  |  | 0.6 |
| Mean | 57.2 | 59.1 |  |
| Median (range) | 58 (36-83) | 60 (36-80) |  |
|  | **Progression-free survival**  **(months)** | **Time of therapy**  **(months)** | <0.0001 |
| Mean | 9.7 | 23.4 |  |
| Median (range) | 9.4 (0.7-21.6) | 22.6 (13.6-37.3) |  |
| **Race** |  |  | 0.5 |
| White | 20 (80.0) | 21 (72.4) |  |
| Black | 3 (12.0) | 3 (10.3) |  |
| Spanish, Hispanic | 2 (8.0) | 3 (10.3) |  |
| Asian/Pacific | 0 | 2 (7.0) |  |
| **Clinical stage at initial diagnosis** |  |  | 0.4 |
| I - IIIC | 19 (76.0) | 19 (65.5) |  |
| IV | 6 (24.0) | 10 (34.5) |  |
| **Tumor stage (T)** |  |  | 0.6 |
| TX, T1a - T1c | 8 (32.0) | 7 (24.1) |  |
| T2 - T4 | 17 (68.0) | 22 (75.9) |  |
| **Nodal stage (N)** |  |  | 0.8 |
| N0 | 9 (36.0) | 9 (31.0) |  |
| N1 - N3c | 16 (64.0) | 20 (69.0) |  |
| **Metastasis stage (M)** |  |  | 0.4 |
| M0 | 19 (76.0) | 18 (62.0) |  |
| M1 | 6 (24.0) | 11 (38.0) |  |
| **ER Status at initial diagnosis** |  |  | 0.5 |
| Pos | 24 (96.0) | 29 |  |
| Neg | 1 (4.0) | 0 |  |
| **PR Status at initial diagnosis** |  |  | 0.02 |
| Pos | 18 (72.0) | 28 (96.6) |  |
| Neg | 7 (28.0) | 1 (3.4) |  |
| **Grade at initial diagnosis** |  |  | 0.6 |
| I | 3 (12.0) | 7 (24.1) |  |
| II | 15 (60.0) | 15 (51.7) |  |
| III | 7 (28.0) | 7 (24.1) |  |
| **Ki67 at initial diagnosis** |  |  | 0.5 |
| Mean | 22.8 | 26.5 |  |
| Median (range) | 22 (1-58) | 20 (5-90) |  |
| **Lymphatic invasion at initial diagnosis** |  |  | 0.8 |
| Pos | 15 (60.0) | 19 (65.5) |  |
| Neg | 10 (40.0) | 10 (34.5) |  |
| **Vascular invasion at initial diagnosis** |  |  | 0.2 |
| Pos | 10 (40.0) | 18 (62.1) |  |
| Neg | 15 (60.0) | 11 (37.9) |  |
| **Adjuvant chemo** |  |  | 0.2 |
| Yes | 17 (68.0) | 14 (48.3) |  |
| No | 8 (32.0) | 15 (51.7) |  |
| **Any visceral at start of palbo** |  |  | 0.2 |
| Yes | 15 (60.0) | 11 (37.9) |  |
| No | 10 (40.0) | 18 (62.1) |  |
| **Prior therapy for metastatic disease:**  **prior hormonal** |  |  | 0.003 |
| Yes | 12 (48.0) | 3 (10.3) |  |
| No | 13 (52.0) | 26 (89.7) |  |
| **Prior therapy for metastatic disease: chemo alone** |  |  | 0.007 |
| Yes | 10 (40.0) | 2 (6.9) |  |
| No | 15 (60.0) | 27 (93.1) |  |
| **Prior therapy for metastatic disease: hormonal + chemo** |  |  | 1 |
| Yes | 0 | 1 (3.4) |  |
| No | 25 (100) | 28 (96.6) |  |

*Fisher’s exact test and t test.

**Table S7**. Clinical, pathologic, and treatment characteristics of patients who progressed (intrinsic or acquired) on first line (+ letrozole) or second line (+ fulvestrant) accrued for this study. Intrinsic resistance was defined as progressive disease within 6 months for first-line (+ letrozole) or within 4 months for second-line (+ fulvestrant) treatment. Acquired resistance was defined as progression after an initial clinical response for measurable disease at any time, or lack of progression for 12 months in the first-line setting and 6 months in the second-line setting.

|  | **Palbo response (progressors) N=25** | | | | **Palbo response (non-progressors) N=29** | |
| --- | --- | --- | --- | --- | --- | --- |
|  | **L/P Prog < 1 yr**  **N=9** | **L/P Prog ≥ 1 yr N=7** | **F/P Prog < 6 mo N=5** | **F/P Prog ≥ 6 mo N=4** | **L/P treatment time ≥ 1 yr N=25** | **F/P treatment time ≥ 6 mo N=4** |
| **Age at start of palbo** |  |  |  |  |  |  |
| Mean | 59.4 | 60.4 | 49 | 56.8 | 59.1 | 59.5 |
| Median (range) | 59 (45-72) | 60 (44-83) | 52 (36-61) | 56 (41-74) | 60 (36-77) | 60.5 (37-80) |
|  | **Progression-free survival (months)** | | | | **Time of therapy (months)** | |
| Mean | 4.9 | 18.7 | 3.0 | 12.8 | 23.2 | 24.1 |
| Median (range) | 5.0 (0.7-10.7) | 19.7 (13.1-21.6) | 3.0 (2.4- 3.5) | 13.1 (10.3-14.7) | 22.6 (13.6-37.3) | 22.5 (19.3-32.2) |
| **Race** |  |  |  |  |  |  |
| White | 8 | 6 | 4 | 2 | 17 | 4 |
| Black | 1 | 1 | 1 | 0 | 3 | 0 |
| Spanish, Hispanic | 0 | 0 | 0 | 2 | 3 | 0 |
| Asian/ Pacific | 0 | 0 | 0 | 0 | 2 | 0 |
| **Clinical stage at initial diagnosis** | |  |  |  |  |  |
| I – IIIC | 8 | 4 | 3 | 4 | 16 | 3 |
| IV | 1 | 3 | 2 | 0 | 9 | 1 |
| **Tumor stage (T)** |  |  |  |  |  |  |
| TX, T1a - T1c | 4 | 2 | 1 | 1 | 6 | 1 |
| T2 - T4 | 5 | 5 | 4 | 3 | 19 | 3 |
| **Nodal stage (N)** |  |  |  |  |  |  |
| N0 | 4 | 1 | 3 | 1 | 7 | 2 |
| N1 - N3c | 5 | 6 | 2 | 3 | 18 | 2 |
| **Metastasis stage (M)** |  |  |  |  |  |  |
| M0 | 8 | 4 | 3 | 4 | 15 | 3 |
| M1 | 1 | 3 | 2 | 0 | 10 | 1 |
| **ER Status at initial diagnosis** | |  |  |  |  |  |
| Positive | 9 | 7 | 5 | 3 | 25 | 4 |
| Negative | 0 | 0 | 0 | 1 | 0 | 0 |
| **PR Status at initial diagnosis** | |  |  |  |  |  |
| Positive | 7 | 4 | 5 | 2 | 25 | 3 |
| Negative | 2 | 3 | 0 | 2 | 0 | 1 |
| **Grade at initial diagnosis** |  |  |  |  |  |  |
| I | 1 | 1 | 1 | 0 | 6 | 1 |
| II | 5 | 5 | 2 | 3 | 13 | 2 |
| III | 3 | 1 | 2 | 1 | 6 | 1 |
| **Ki-67 at initial diagnosis** |  |  |  |  |  |  |
| Mean | 23.2 | 17.6 | 32.7 | 20.7 | 25.2 | 40 |
| Median (range) | 20 (9-50) | 15 (1-41) | 30 (10-58) | 22 (10-30) | 20 (5-90) | 40 (20-60) |
| **Lymphatic invasion at initial diagnosis** | |  |  |  |  |  |
| Positive | 7 | 4 | 3 | 1 | 16 | 3 |
| Negative | 2 | 3 | 2 | 3 | 9 | 1 |
| **Vascular invasion at initial diagnosis** | |  |  |  |  |  |
| Positive | 4 | 2 | 3 | 1 | 15 | 3 |
| Negative | 5 | 5 | 2 | 3 | 10 | 1 |
| **Adjuvant chemo** |  |  |  |  |  |  |
| Yes | 8 | 3 | 3 | 1 | 11 | 3 |
| No | 1 | 4 | 2 | 3 | 14 | 1 |
| **Any visceral at start of palbo** | |  |  |  |  |  |
| Yes | 6 | 5 | 1 | 3 | 9 | 2 |
| No | 3 | 2 | 4 | 1 | 16 | 2 |
| **Prior therapy for metastatic disease:**  **prior hormonal** | |  |  |  |  |  |
| Yes | 3 | 3 | 3 | 3 | 0 | 3 |
| No | 6 | 4 | 2 | 1 | 25 | 1 |
| **Prior therapy for metastatic disease:**  **chemo alone** | |  |  |  |  |  |
| Yes | 3 | 1 | 4 | 2 | 1 | 1 |
| No | 6 | 6 | 1 | 2 | 24 | 3 |
| **Prior therapy for metastatic disease: hormonal + chemo** | |  |  |  |  |  |
| Yes | 0 | 0 | 0 | 0 | 0 | 1 |
| No | 9 | 7 | 5 | 4 | 25 | 3 |

**Table S8**. Immunohistochemistry scoring of ER, PR, Cyclin E, γH2AX, pY-STAT3 and BRCA mutational status in patients who progressed on palbociclib. ER, PR, γH2AX, pY-STAT3 IHC scores are based on percent of positive nuclear staining. Cyclin E IHC score is based on negative (0) or positive (1) cytoplasmic staining. *Patient 26 was only tested for γH2AX.

| **Progressors** | **ER- Pre-** | **ER- Post-** | **PR Pre-** | **PR Post-** | **Cyclin E Pre-** | **Cyclin E Post-** | **BRCA1/2**  **Pre-** | **ɣ-H2AX (%)**  **Pre-** | **ɣ-H2AX (%) Post-** | **p-STAT3 (%) Pre-** | **p-STAT3 (%) Post-** |
| --- | --- | --- | --- | --- | --- | --- | --- | --- | --- | --- | --- |
| 1 | 30 | 50 | 70 | 80 | 0 | 1 | WT | 60 | 1 | 6 | 15 |
| 2 | 10 | N/A | 5 | N/A | 0 | 1 | N/A | 0 | N/A | 1 | N/A |
| 3 | 5 | 30 | 50 | 5 | 1 | 1 | BRCA1 | 0 | 10 | 1 | 2 |
| 4 | 30 | 0 | 1 | 0 | 0 | 0 | N/A | 0 | 5 | 15 | 8 |
| 5 | 65 | 0 | N/A | 0 | 1 | 1 | N/A | N/A | 1 | 15 | 3 |
| 6 | 70 | 0 | 10 | 1 | 0 | 0 | N/A | 2 | 5 | 1 | 3 |
| 7 | 95 | 70 | N/A | 0 | 1 | 1 | N/A | N/A | 10 | 10 | 8 |
| 8 | 70 | 80 | 2 | 30 | 0 | 0 | N/A | 1 | 5 | 5 | 25 |
| 9 | 0 | 1 | 0 | 10 | 1 | 1 | N/A | 0 | 1 | 1 | 8 |
| 10 | 75 | 75 | 20 | 80 | 0 | 0 | Wildtype | 0 | 5 | 2 | 8 |
| 11 | 25 | 0 | 25 | 0 | 0 | 1 | Wildtype | 5 | 5 | 7 | 1 |
| 12 | 0 | 3 | 30 | 10 | 1 | 1 | Wildtype | 0 | 3 | 2 | 1 |
| 13 | 95 | 65 | 10 | 1 | 0 | 1 | N/A | 5 | 5 | 2 | 1 |
| 14 | 1 | 15 | 2 | 0 | 0 | 0 | Wildtype | 1 | 5 | 1 | 15 |
| 15 | 30 | 0 | 0 | 0 | 0 | 1 | Wildtype | 10 | 30 | 5 | 1 |
| 16 | 75 | 15 | N/A | 70 | 1 | 1 | N/A | N/A | 10 | 3 | 5 |
| 17 | 25 | 65 | N/A | 5 | 0 | 1 | Wildtype | N/A | 2 | 1 | 5 |
| 18 | 80 | 15 | 5 | N/A | 1 | 1 | Wildtype | 2 | N/A | 15 | 17 |
| 19 | 75 | 75 | 1 | 5 | 0 | 1 | Wildtype | 1 | 5 | 1 | 15 |
| 20 | 75 | 80 | <1 | 2 | 0 | 0 | N/A | 1 | 5 | 15 | 20 |
| 21 | 95 | 40 | 1 | 20 | 0 | 0 | Wildtype | 0 | 0 | 1 | 1 |
| 22 | 85 | 70 | 5 | 70 | 0 | 0 | N/A | 30 | 5 | 25 | 60 |
| 23 | 85 | 20 | 30 | 20 | 1 | 1 | Wildtype | 5 | 7 | 1 | 1 |
| 24 | 20 | 20 | 10 | 10 | 0 | 0 | N/A | 0 | 0 | 15 | 15 |
| 25 | 1 | 5 | N/A | N/A | 0 | 0 | N/A | N/A | N/A | 1 | 3 |
| 26* | N/A | N/A | N/A | N/A | N/A | N/A | N/A | 0 | 70 | N/A | N/A |
